# Supplementary material
Source: Springer Nature journal article supplement (https://www.springermedizin.de/resource/supplementary/12885_2010_2591_MOESM2_ESM.pdf/9462628)

**A**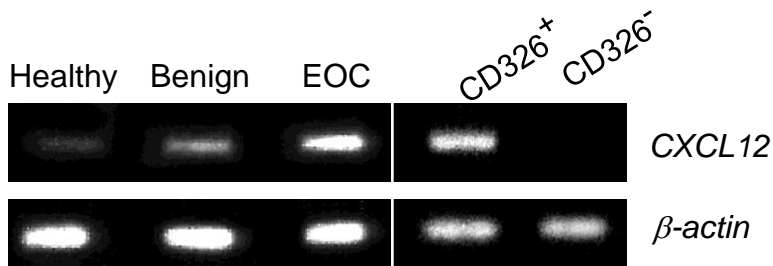**B**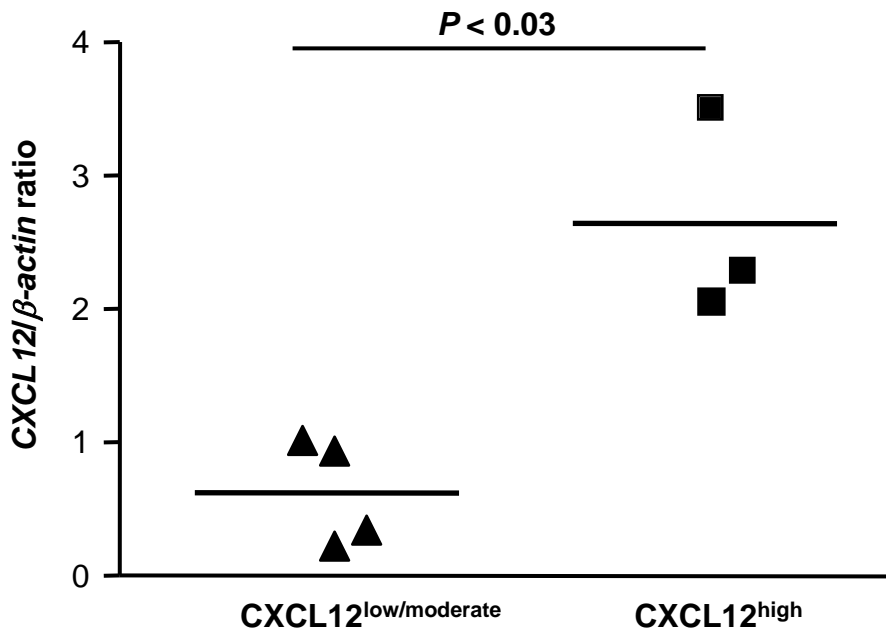

Supplement: MOESM2 [file 9462628]
